# Supplementary material for: An extended quinoid molecule based on bis(thiophene-diketopyrrolopyrrole) with balanced ambipolar semiconducting properties and strong near-infrared absorption
Source: Royal Society of Chemistry journal article supplement (doi:10.1039/d2qo01678h), 2022-12-02
Supplement: d2qo01678h1.pdf [file d2qo01678h1.pdf]

## Electronic Supplemental Information

### Extended quinoid molecule based on bis(thiophene-diketopyrrolopyrrole) with balanced ambipolar semiconducting property and strong near-infrared absorption

Wansong Shang,<sup>a, b</sup> Guangchao Han,<sup>a, b</sup> Qingrui Fan,<sup>c</sup> Xiaobo Yu,<sup>a, b</sup> Dongsheng Liu,<sup>a, b</sup> Cheng Li,<sup>a, b</sup> Xi-Sha Zhang,<sup>a, b</sup> Yuanping Yi,<sup>a, b</sup> Guanxin Zhang,<sup>\* a, b</sup> Deqing Zhang<sup>\* a, b</sup>

#### Table of Contents

|                                                                                                                  |     |
|------------------------------------------------------------------------------------------------------------------|-----|
| 1. Materials and characterization techniques .....                                                               | S2  |
| 2. TGA analysis .....                                                                                            | S3  |
| 3. Theoretical calculations .....                                                                                | S3  |
| 4. The cyclic voltammograms .....                                                                                | S4  |
| 5. Ultraviolet Photoelectron Spectroscopy (UPS) and Inverse photoemission spectroscopy (IPES) measurements ..... | S4  |
| 6. FET device fabrication and characterization .....                                                             | S5  |
| 7. X-ray diffraction (XRD) and atomic force microscopy (AFM) .....                                               | S6  |
| 8. NMR spectra .....                                                                                             | S7  |
| 9. HRMS spectrum .....                                                                                           | S10 |

## 1. Materials and characterization techniques

Commercial reagents were used as received, unless otherwise indicated. Compound DPP-Br was purchased from SunaTech Inc., Jiangsu, China.

$^1\text{H}$ NMR and  $^{13}\text{C}$ NMR spectra were measured on Bruker AVANCE III 400 MHz and 700 MHz spectrometers. Tetramethylsilane (TMS) served as the internal standard for  $^1\text{H}$  NMR, and  $\text{CDCl}_3$  or  $\text{CD}_2\text{Cl}_2$  served as the internal standard for  $^{13}\text{C}$  NMR. The following abbreviations were used to express the multiplicities: s = singlet; d = doublet; m = multiplet; br = broad. Matrix assisted laser desorption/ionization time-of-flight (MALDI-FTICR) mass spectra were collected on a Bruker Solarix-XR high-resolution mass spectrometer. Melting points were measured on a BÜCHI melting point B-540. Elemental analysis was conducted on a Carlo-Erba-1106 instrument. Ultraviolet-visible-NIR absorption spectra were carried out on a Shimadzu UV-2600 spectrophotometer. Cyclic voltammetric measurements were carried out in a three-electrode cell by using glassy carbon as the working electrode, a Pt as auxiliary electrode, and an Ag/AgCl (saturated KCl) as reference electrode on a computer-controlled CHI660C instrument at room temperature; the scan rate was  $100\text{ mV s}^{-1}$ , and  $\text{nBu}_4\text{NPF}_6$  was used as the supporting electrolyte. For calibration, the redox potential of ferrocene/ferrocenium ( $\text{Fc}/\text{Fc}^+$ ) was measured under the same conditions. Thermogravimetric analysis (TGA) measurements were carried out on a PerkinElmer series 7 thermal analysis system under  $\text{N}_2$  at a heating rate of  $10\text{ }^\circ\text{C min}^{-1}$ . Atomic-force microscopy images were taken by using a Digital Instruments Nanoscope V atomic force microscope operated in tapping mode with a Nanoscope V instrument in air. XRD measurements were performed at the Panalytical empyrean, using X-rays with a wavelength of  $\lambda = 1.54\text{ \AA}$ .

## 2. TGA analysis

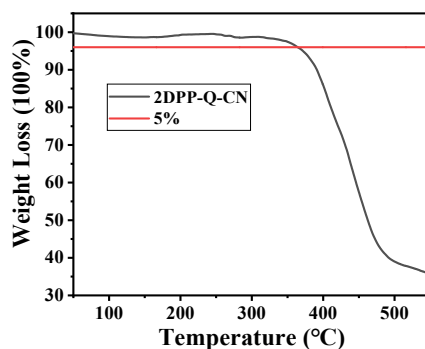

**Figure S1** TGA curve for 2DPP-Q-CN, recorded at a heating and cooling rate (50-550 °C) of 10 °C min<sup>-1</sup> under nitrogen.

## 3. Theoretical calculations

The ground-state geometry of 2DPP-Q-CN was optimized by density functional theory (DFT) at the B3LYP/6-31G(d, p) level. To simplify the calculation, the alkyl chains are replaced by methyl groups. Then, the vertical excitations were calculated by time-dependent DFT at the same level with the polarizable continuum model for chloroform.

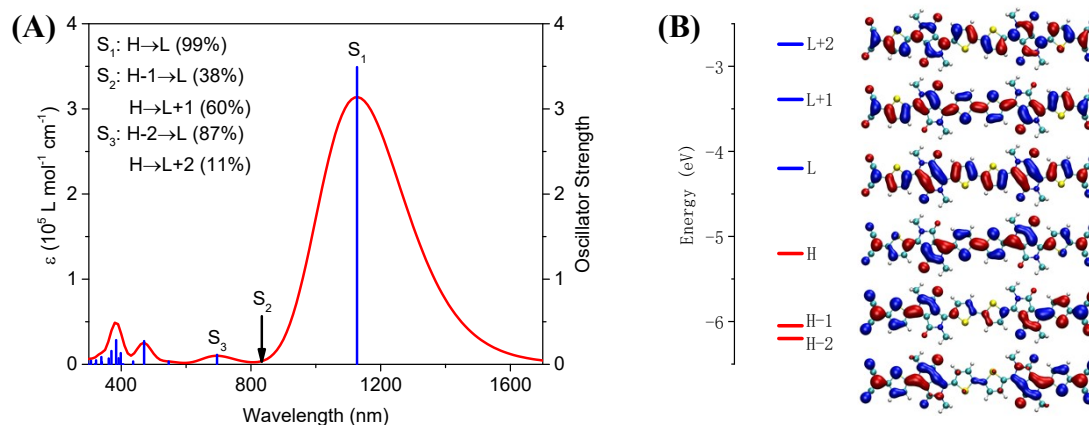

**Figure S2** A) Simulated absorption spectrum of 2DPP-Q-CN; B) The frontier molecular orbitals of 2DPP-Q-CN and corresponding energy levels.

#### 4. The cyclic voltammograms

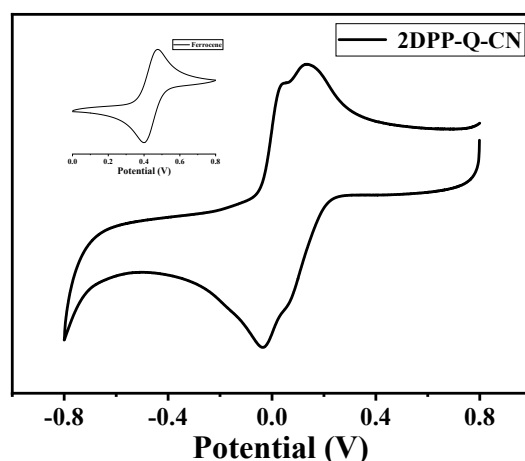

**Figure S3** Cyclic voltammogram of 2DPP-Q-CN in  $\text{CH}_2\text{Cl}_2$  solution (1 mM) with scan rate of  $100 \text{ mV s}^{-1}$ . The inset shows the cyclic voltammograms of ferrocene under the same condition.

#### 5. Ultraviolet Photoelectron Spectroscopy (UPS) and Inverse Photoemission Spectroscopy (IPES) measurements.

The UPS measurement was conducted a Kratos ULTRA AXIS DLD photoelectron spectroscopy system with an ultra-high vacuum of  $3 \times 10^{-9}$  Torr. He-discharge lamp (21.22 eV) excitation sources were taken as excitation source. The IPES measurement was performed using a customized ULVAC-PHI LEIPS instrument with Bremsstrahlung isochromatic mode. The samples were fabricated by spin-coating method as follows: 2DPP-Q-CN was dissolve in chloroform (10 mg/mL) and spin-coating on ITO substrate at 2000 rpm for 60 s.

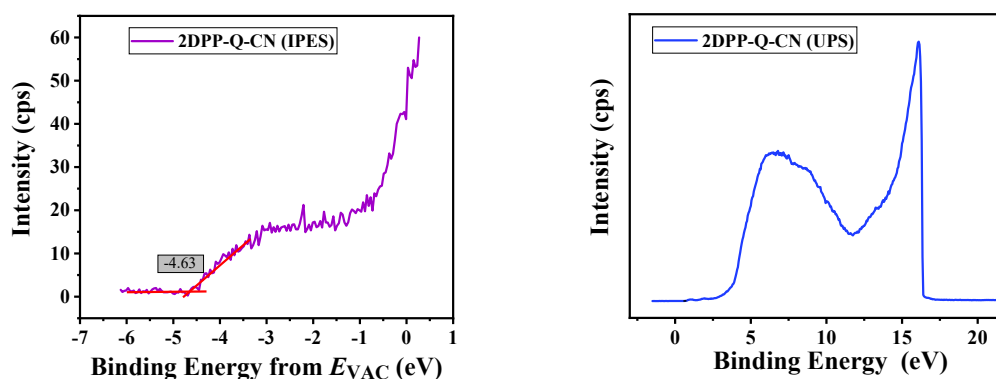

**Figure S4** IPES (*left*) and UPS (*right*) spectra of 2DPP-Q-CN thin film

#### 6. FET device fabrication and characterization

FETs with a top-gate/bottom-contact (TGBC) configuration were fabricated on heavily doped silicon wafers covered with 300 nm thick silicon dioxide layers. The drain–source (D–S) gold contacts were fabricated by photolithography. The substrates were first cleaned by acetone and water, then immersed in Piranha solution (2: 1 mixture of sulfuric acid and 30% hydrogen peroxide). The substrates were further rinsed with deionized water and isopropyl alcohol for several times and subsequently dried under vacuum at 80 °C, after that the silica substrates were modified with octadecyltrichlorosilane (OTS). They were washed with *n*-hexane, CHCl<sub>3</sub> and isopropyl alcohol sequentially. Compound 2DPP-Q-CN was dissolved in CHCl<sub>3</sub> (10 mg mL<sup>-1</sup>), and spin-coating on the substrate at 2000 rpm for 60 s. The annealing process was carried out in a nitrogen box for 10 min at different temperatures. Polymethylmethacrylate (PMMA, Mw = 996 kDa) solution in anhydrous *n*-butyl acetate (60 mg/mL) was spin-coated on the surface of the polymer layer to give PMMA thin films (PMMA thickness~900 nm, C<sub>i</sub> = 2.56 nF/cm<sup>2</sup>) , followed by thermal annealing at 90 °C for 60 min in a nitrogen box. The aluminum gate electrode (~ 80 nm) was deposited on the dielectric layer by a vacuum deposition method.

All measuring processes were performed under ambient conditions with a relative humidity of 20~40%. The FET device performance was evaluated on a Keithley 4200 SCS semiconductor parameter analyzer on a probe stage. The carrier mobility ( $\mu$ ) was calculated from the data in the saturated regime according to the equation:

$$I_{DS} = (W/2L) \mu_{sat} C_i (V_G - V_T)^2$$

where  $I_{DS}$  is the saturation drain current,  $W/L$  is the channel width/length,  $C_i$  is the capacitance per unit area of the gate dielectric layer, and  $V_G$  and  $V_T$  are the gate voltage and the threshold voltage, respectively. The channel length and channel width of the FET devices were 5  $\mu$ m and 1440  $\mu$ m, respectively.

**Table S1** Hole mobilities ( $\mu_h$ ), electron mobilities ( $\mu_e$ ), threshold voltages ( $V_T$ ), and current on/off ratios ( $I_{on}/I_{off}$ ) for OFET devices based on thin-films of 2DPP-Q-CN after annealing at different temperatures.

| Annealing temp.(°C) | $\mu_h^a$<br>[cm <sup>2</sup> V <sup>-1</sup> s <sup>-1</sup> ] | $V_T$ [V] | $I_{on}/I_{off}$ | $\mu_e^a$<br>[cm <sup>2</sup> V <sup>-1</sup> s <sup>-1</sup> ] | $V_T$ [V] | $I_{on}/I_{off}$ |
|---------------------|-----------------------------------------------------------------|-----------|------------------|-----------------------------------------------------------------|-----------|------------------|
| 100°C               | $3.5 \times 10^{-5}$ /<br>$1.6 \times 10^{-6}$                  | -40 ~ -60 | 10               | $1.2 \times 10^{-5}$ /<br>$5.1 \times 10^{-6}$                  | 30 ~ 40   | 10               |
| 120°C               | 0.19 / 0.16                                                     | -50 ~ -70 | 10               | 0.20 / 0.17                                                     | 30 ~ 50   | 10               |

<sup>a</sup> The hole/electron mobilities were provided in ‘highest/average’ form, and the highest and average data are based on 10 different OFET devices.

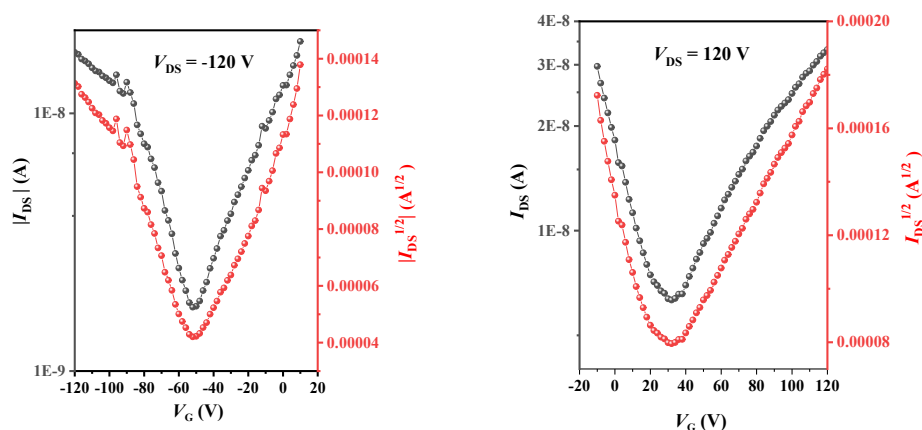

**Figure S5** Transfer curves of thin film OFET device of 2DPP-Q-CN after annealing at 100 °C for 10 min.

## 7. X-ray diffraction (XRD) and atomic force microscopy (AFM)

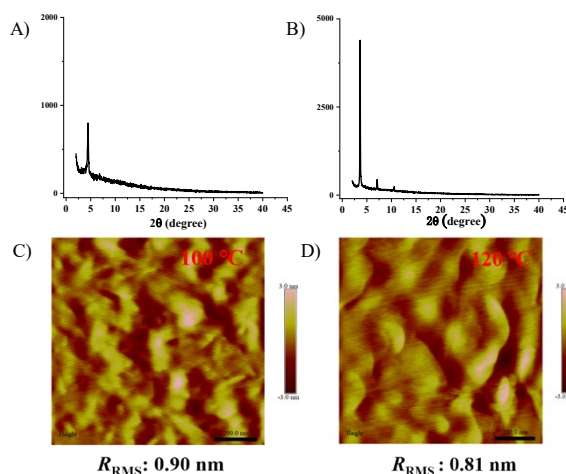

**Figure S6** XRD pattern (A, B) and AFM images (C, D) of the 2DPP-Q-CN thin film after annealing at 100 °C (A, C) or 120 °C (B, D) for 10 min.

## 8. NMR spectra

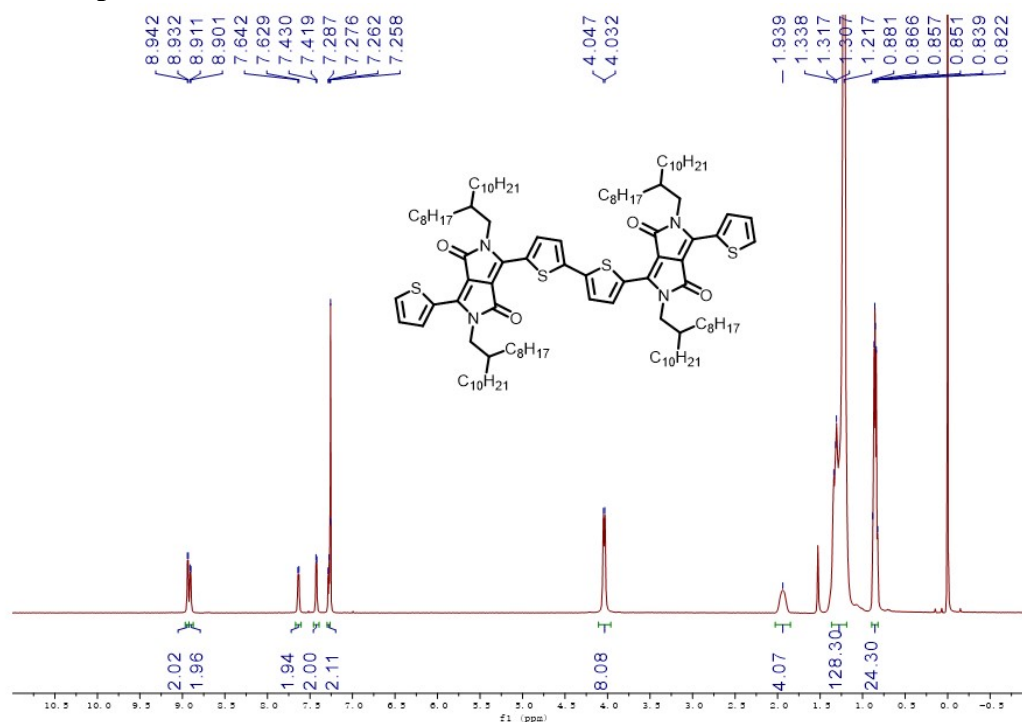

Figure S7 <sup>1</sup>H NMR spectrum of 2DPP in CDCl<sub>3</sub>

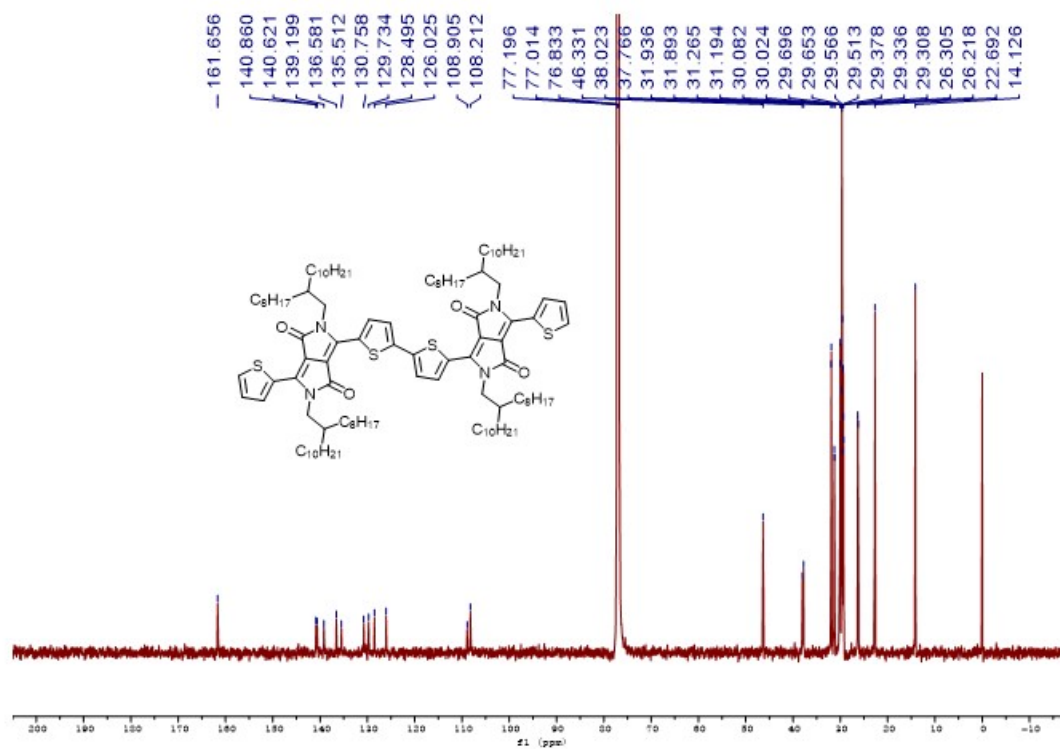

Figure S8 <sup>13</sup>C NMR spectrum of 2DPP in CDCl<sub>3</sub>

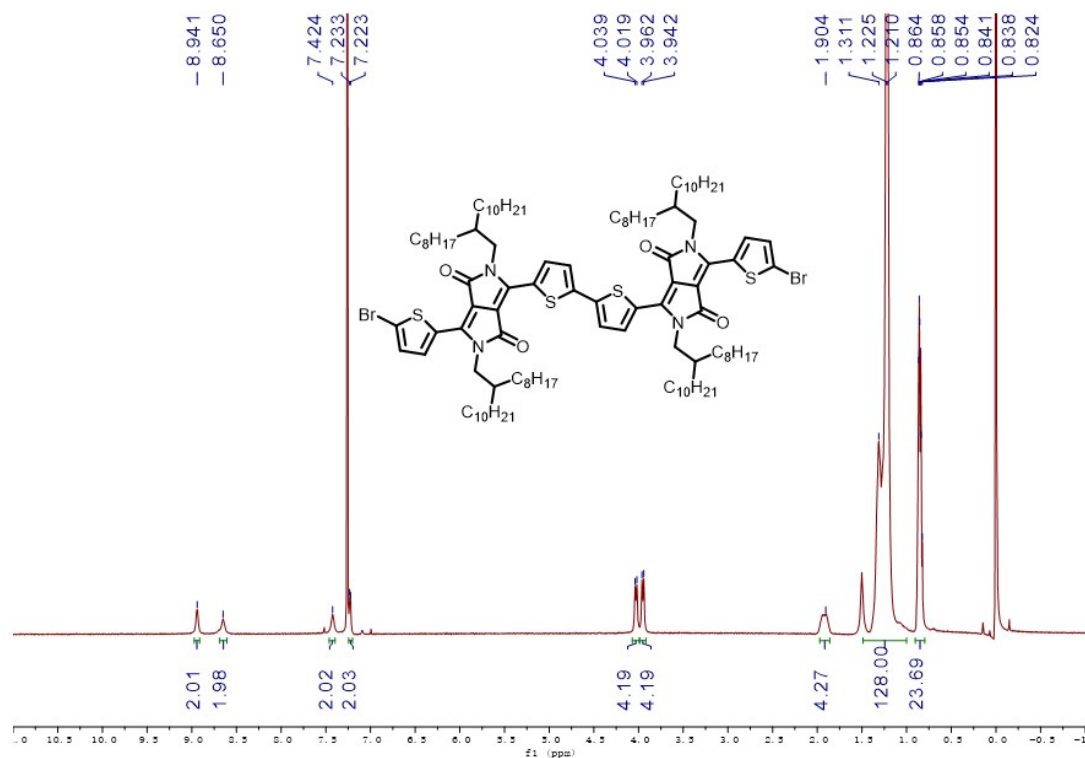

**Figure S9** <sup>1</sup>H NMR spectrum of 2DPP-2Br in CDCl<sub>3</sub>

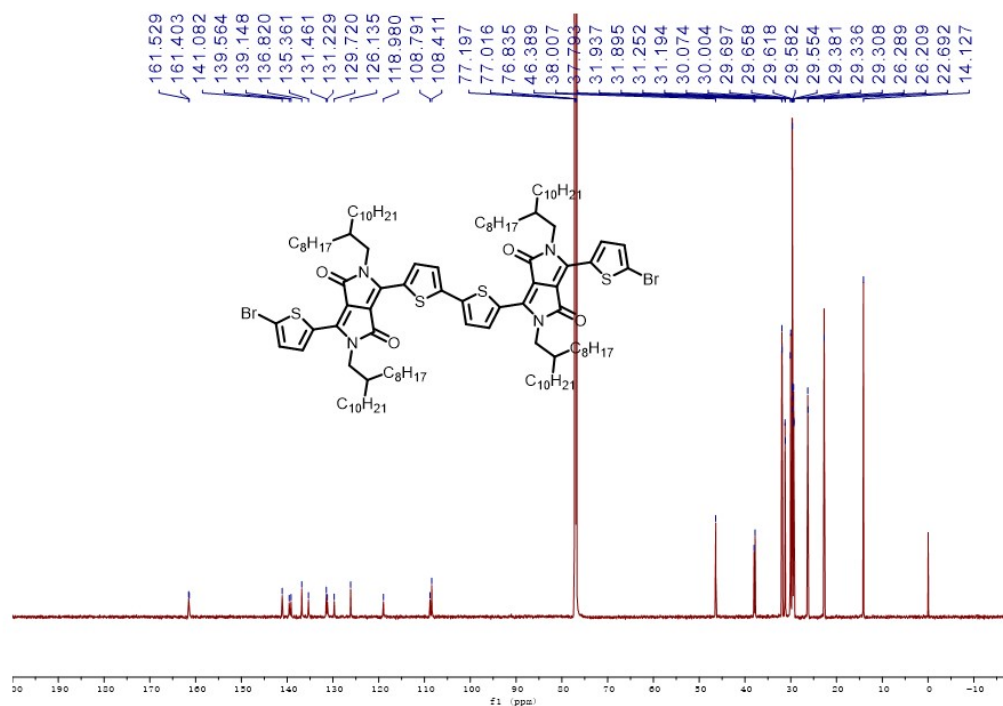

**Figure S10** <sup>13</sup>C NMR spectrum of 2DPP-2Br in CDCl<sub>3</sub>



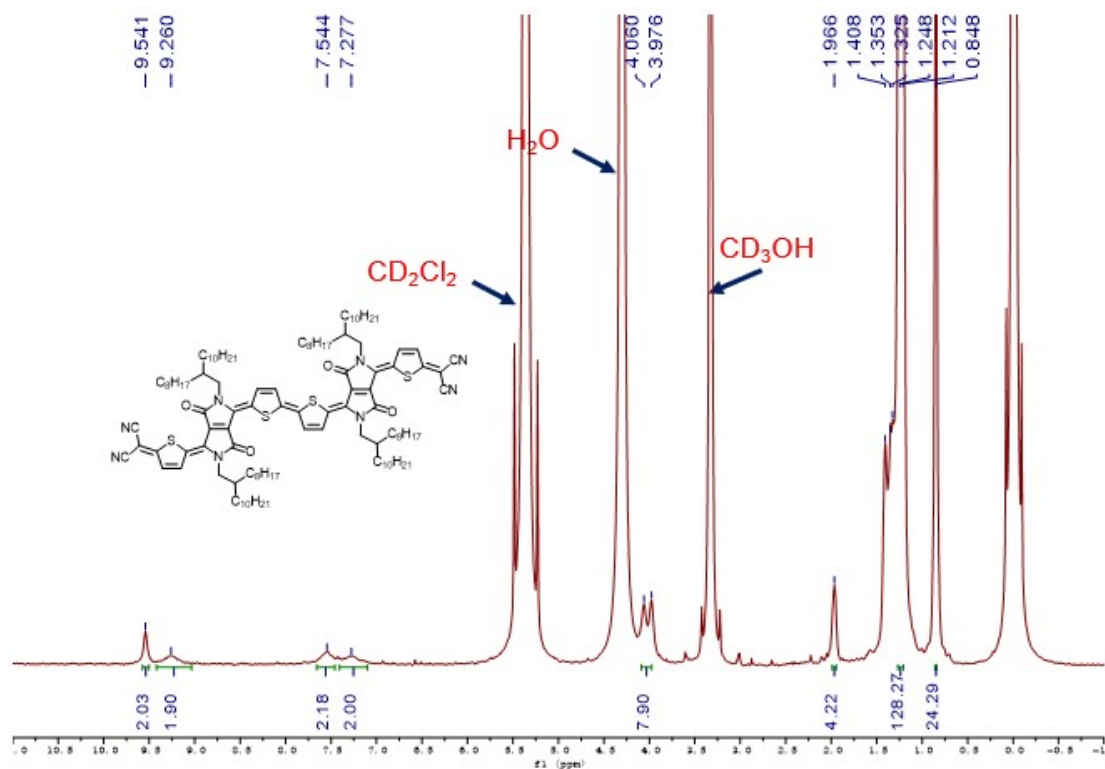

**Figure S11** <sup>1</sup>H NMR spectrum of 2DPP-Q-CN at 253.2 K in CD<sub>2</sub>Cl<sub>2</sub> with a drop of CD<sub>3</sub>OH

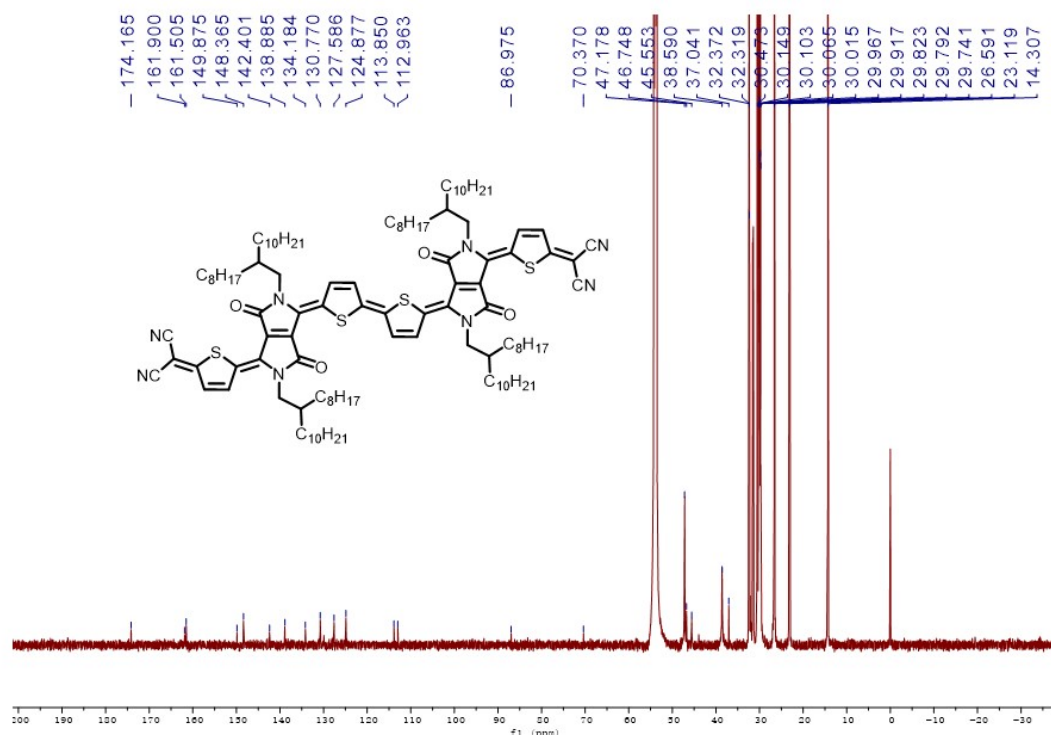

**Figure S12** <sup>13</sup>C NMR spectrum of 2DPP-Q-CN in CD<sub>2</sub>Cl<sub>2</sub>

## 9. HRMS spectrum

# MALDI,9-9-1,20221018

## Analysis Info

Analysis Name D:\Data\MALDI\2022\1018\9-9-1\_0\_i24\_000018.d  
 Method NNNNNNNNN  
 Sample Name MURU-N-ESI  
 Comment

Acquisition Date 10/18/2022 6:06:42 PM

Operator  
 Instrument solariX

## Acquisition Parameter

|                       |            |                      |           |                       |                          |
|-----------------------|------------|----------------------|-----------|-----------------------|--------------------------|
| Acquisition Mode      | Single MS  | Acquired Scans       | 5         | Calibration Date      | Sat May 7 05:37:33 2022  |
| Polarity              | Negative   | No. of Cell Fills    | 1         | Data Acquisition Size | 2097152                  |
| Broadband Low Mass    | 202.1 m/z  | No. of Laser Shots   | 20        | Data Processing Size  | 4194304                  |
| Broadband High Mass   | 3600.0 m/z | Laser Power          | 20.0 Ip   | Apodization           | Sine-Bell Multiplication |
| Source Accumulation   | 0.001 sec  | Laser Shot Frequency | 0.020 sec |                       |                          |
| Ion Accumulation Time | 0.100 sec  |                      |           |                       |                          |

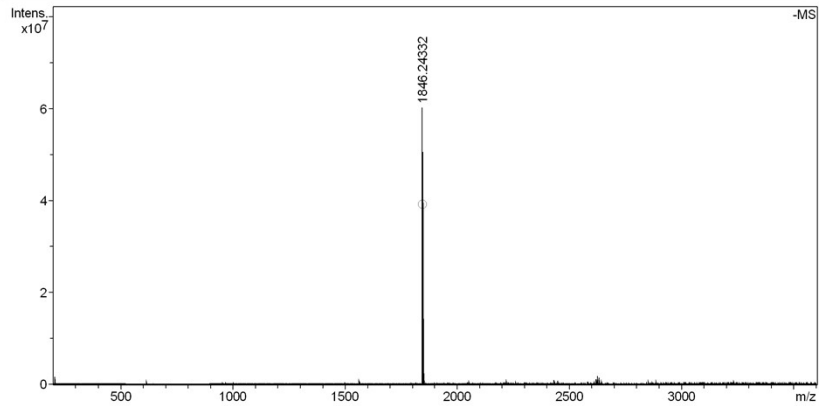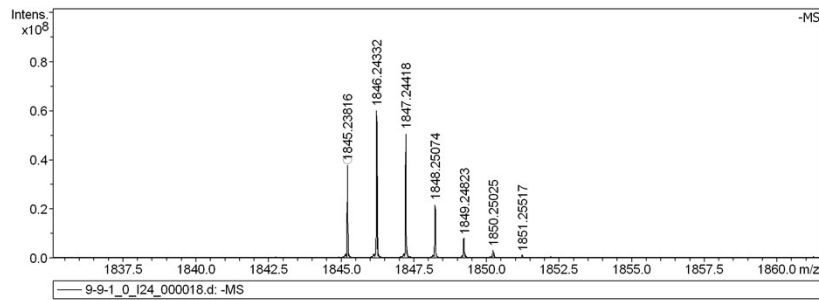

| Meas. m/z   | # | Ion Formula    | Score  | m/z         | err [ppm] | Mean err [ppm] | mSigma | rdB  | e <sup>-</sup> Conf | N-Rule |
|-------------|---|----------------|--------|-------------|-----------|----------------|--------|------|---------------------|--------|
| 1845.238156 | 1 | C114H172N8O4S4 | 100.00 | 1845.238969 | -0.5      | -0.8           | 69.5   | 33.0 | odd                 | ok     |

**Figure S13** HRMS spectrum of 2DPP-Q-CN

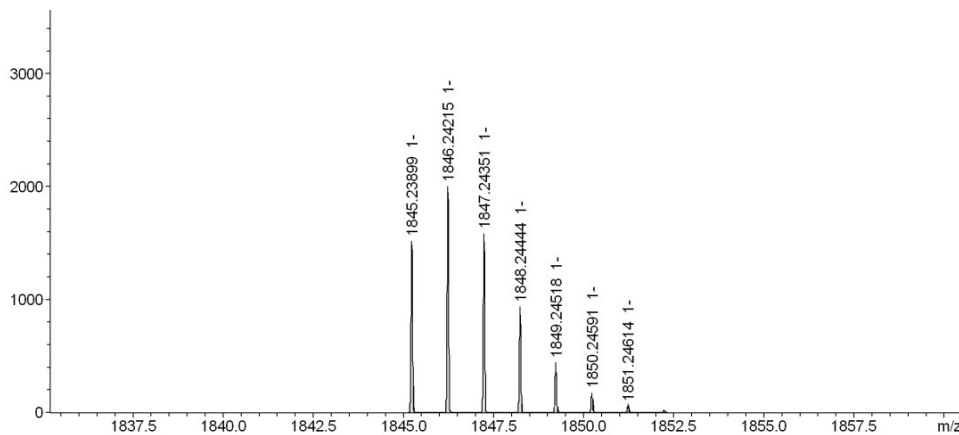

**Figure S14** Calculated isotopic distribution pattern for 2DPP-Q-CN.
